# Supplementary material for: Conformation and self-assembly changes of isomeric peptide amphiphiles influenced by switching tyrosine in the sequences
Source: Royal Society of Chemistry journal article supplement (doi:10.1039/c7tb00736a), 2017-01-01
Supplement: c7tb00736a1.pdf [file c7tb00736a1.pdf]

## ***Supporting Information***

### Conformation and Self-Assembly Changes of Isomeric Peptide Amphiphiles Influenced by Switching Tyrosine in the Sequences

*Fangyi Zhao,<sup>a</sup> Hui Guo,<sup>a</sup> Zhidong Zhang,<sup>a</sup> John Ye,<sup>b</sup> Longlong Liu,<sup>b</sup> Chun-Xia Zhao,<sup>c</sup> and*

*Zhengzhong Shao<sup>a,\*</sup>*

<sup>a</sup> State Key Laboratory of Molecular Engineering of Polymers, Laboratory of Advanced Materials and Department of Macromolecular Science, Fudan University, Shanghai 200433, China.

<sup>b</sup> Peptide Scientific Inc., 10 Madison Road, Fairfield NJ 07004, USA.

<sup>c</sup> Australian Institute for Bioengineering and Nanotechnology, The University of Queensland, St Lucia QLD 4072, Australia

\* Address correspondence to: [zzshao@fudan.edu.cn](mailto:zzshao@fudan.edu.cn) (Z.S.)

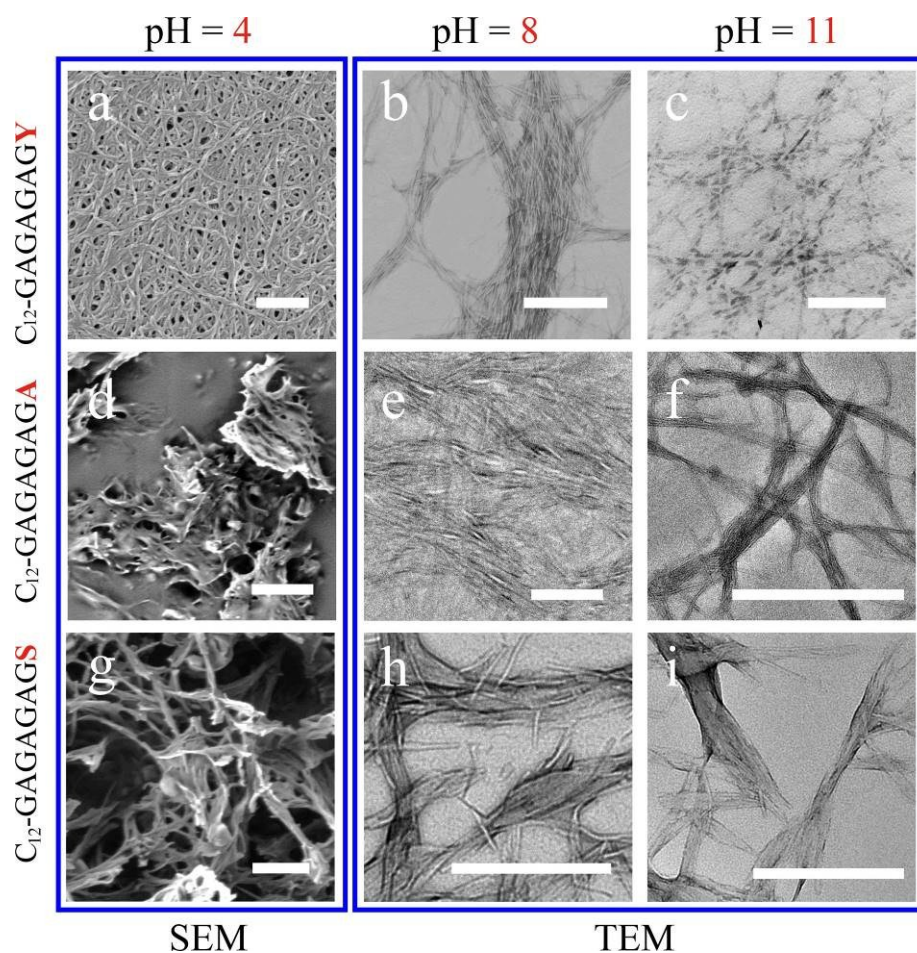

**Figure S1.** SEM and TEM images of self-assembled  $C_{12}$ -GAGAGAGY (a-c, ref. 27 in the text),  $C_{12}$ -GAGAGAGA (d-f), and  $C_{12}$ -GAGAGAGS (g-i), 1 mg/mL, respectively. As all the PAs formed self-supporting hydrogels or precipitates at pH 4, SEM was employed for a better observation instead of TEM. All bars indicate 500 nm.

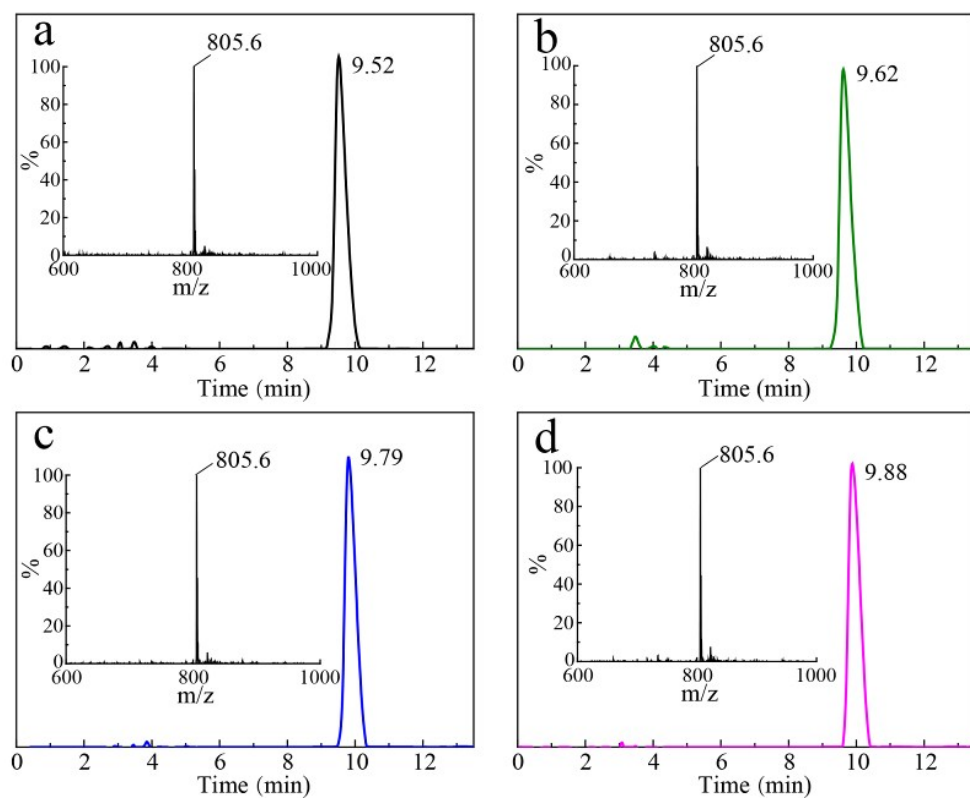

**Figure S2.** LC/ESI-MS analysis of  $C_{12}$ -GAGAGAGY (a),  $C_{12}$ -GAGAGYGA (b),  $C_{12}$ -GAGYGAGA (c), and  $C_{12}$ -GYGAGAG (d), respectively.

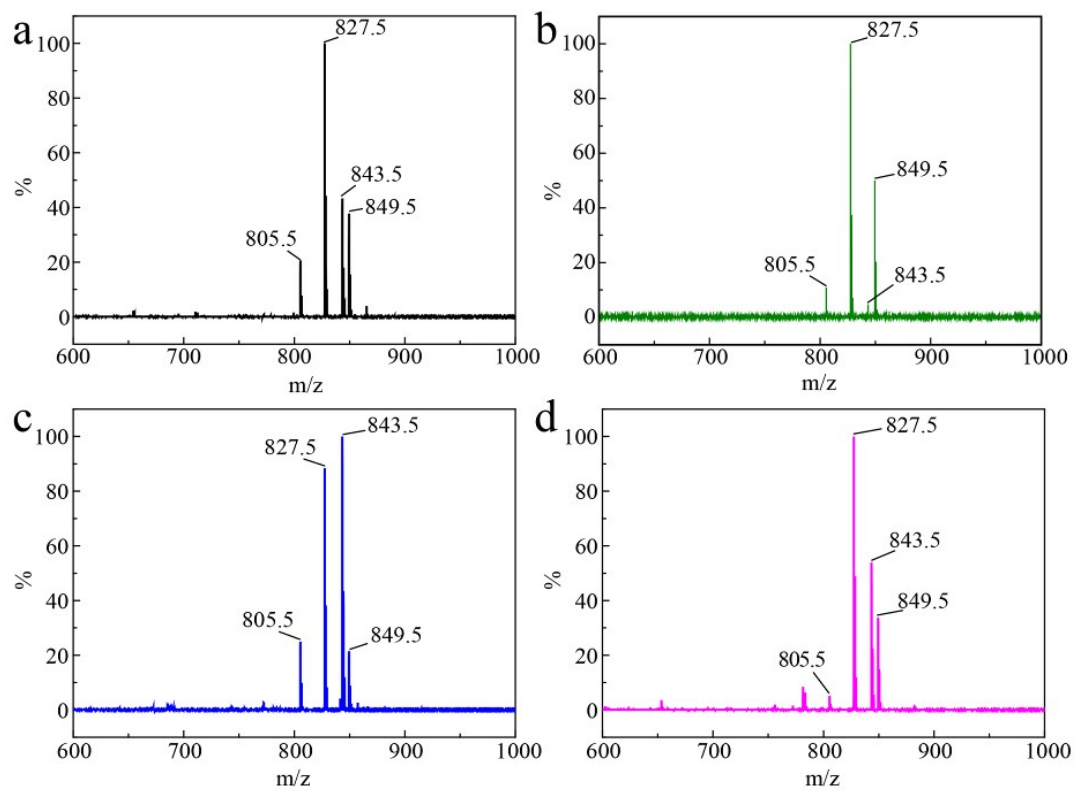

**Figure S3.** MALDI-TOF mass spectra of C<sub>12</sub>-GAGAGAGY (a), C<sub>12</sub>-GAGAGYGA (b), C<sub>12</sub>-GAGYGA (c), and C<sub>12</sub>-GYGAGAG (d), respectively.

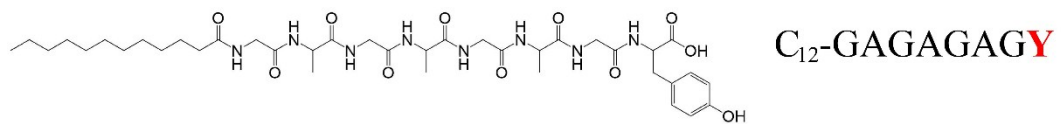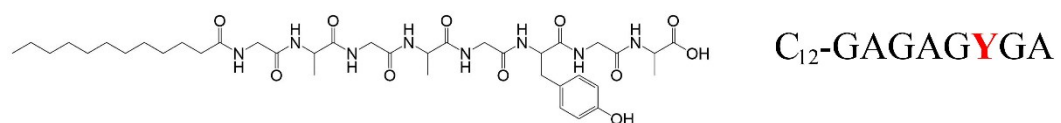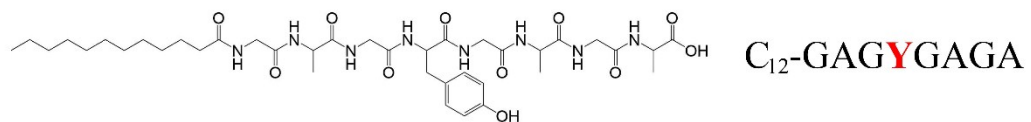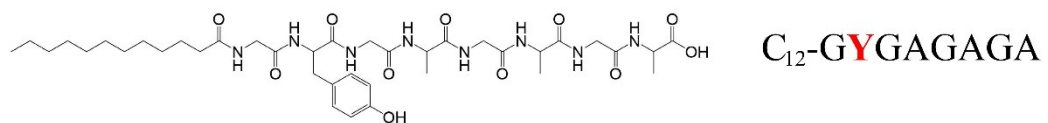

**Figure S4.** Chemical structure of C<sub>12</sub>-GAGAGAGY, C<sub>12</sub>-GAGAGYGA, C<sub>12</sub>-GAGYGAGA, and C<sub>12</sub>-GYGAGAGA.

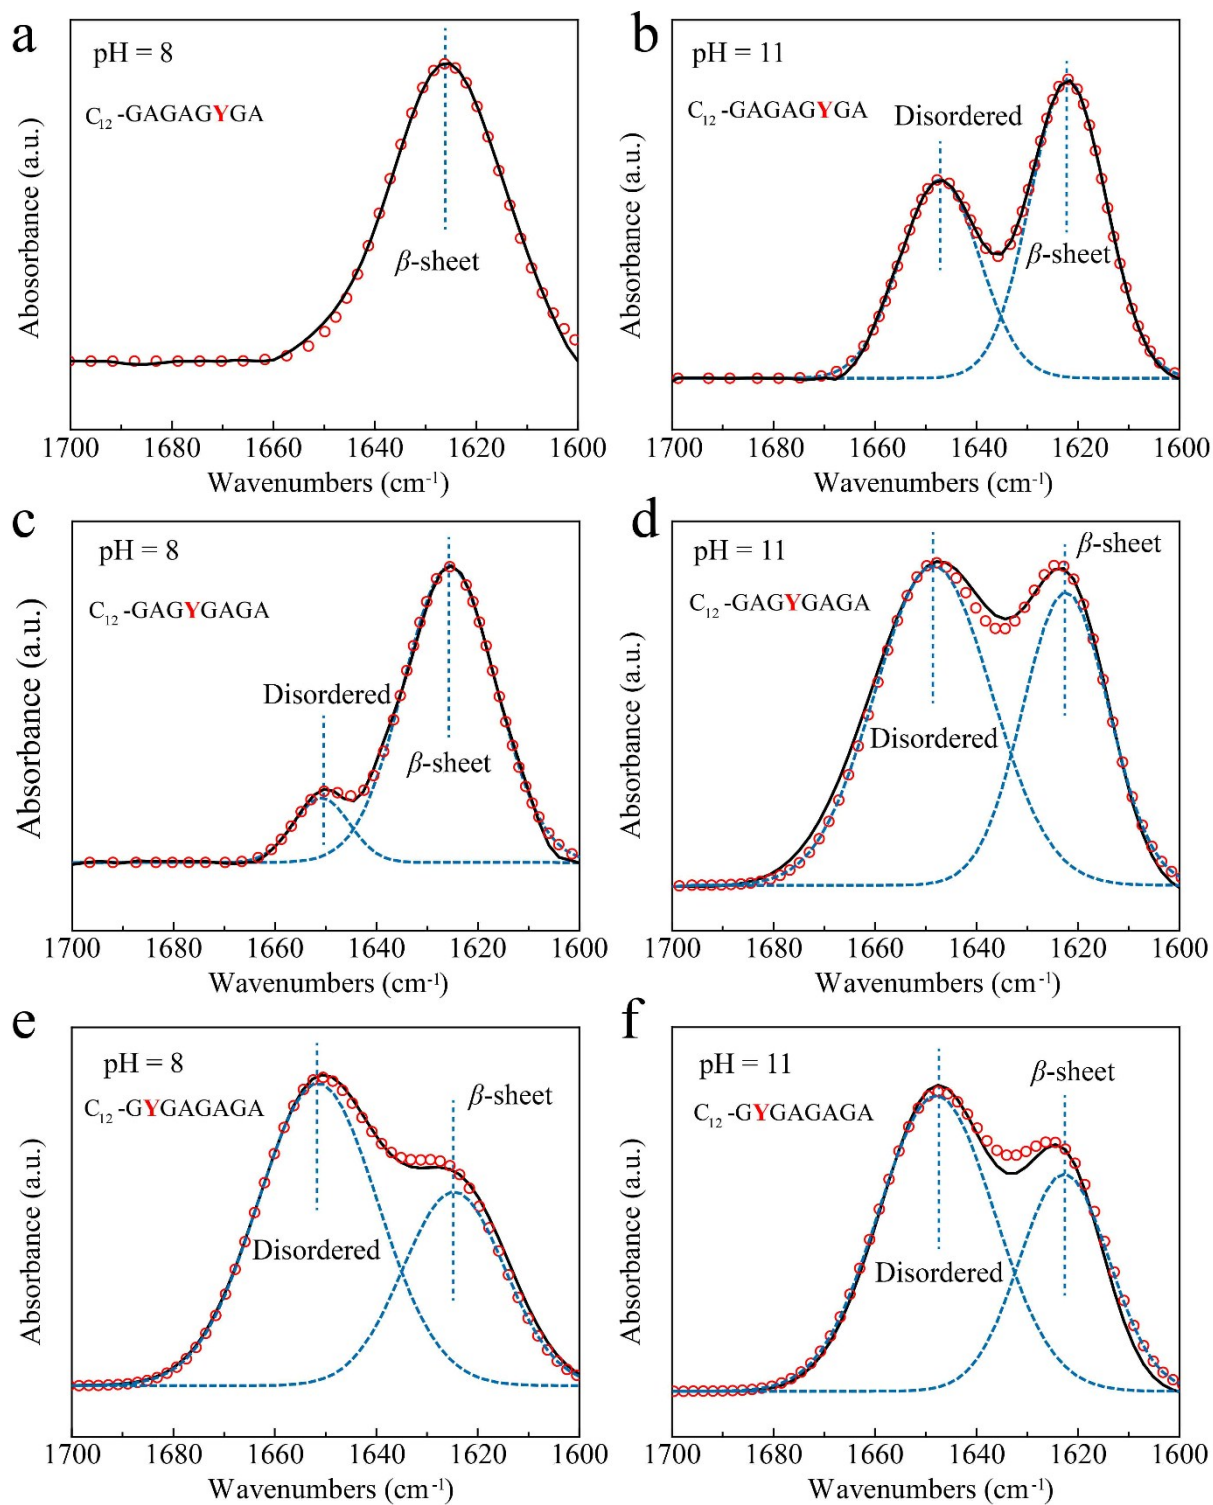

**Figure S5.** The fitted results of FT-IR spectra of C<sub>12</sub>-GAGAGYGA (a, b), C<sub>12</sub>-GAGYGAGA (c, d), and C<sub>12</sub>-GYGAGAGA (e, f) at pH 8 and 11, respectively. The black full lines, blue dash lines and red circles indicate the original FT-IR spectra, peak splitting and fitting results.



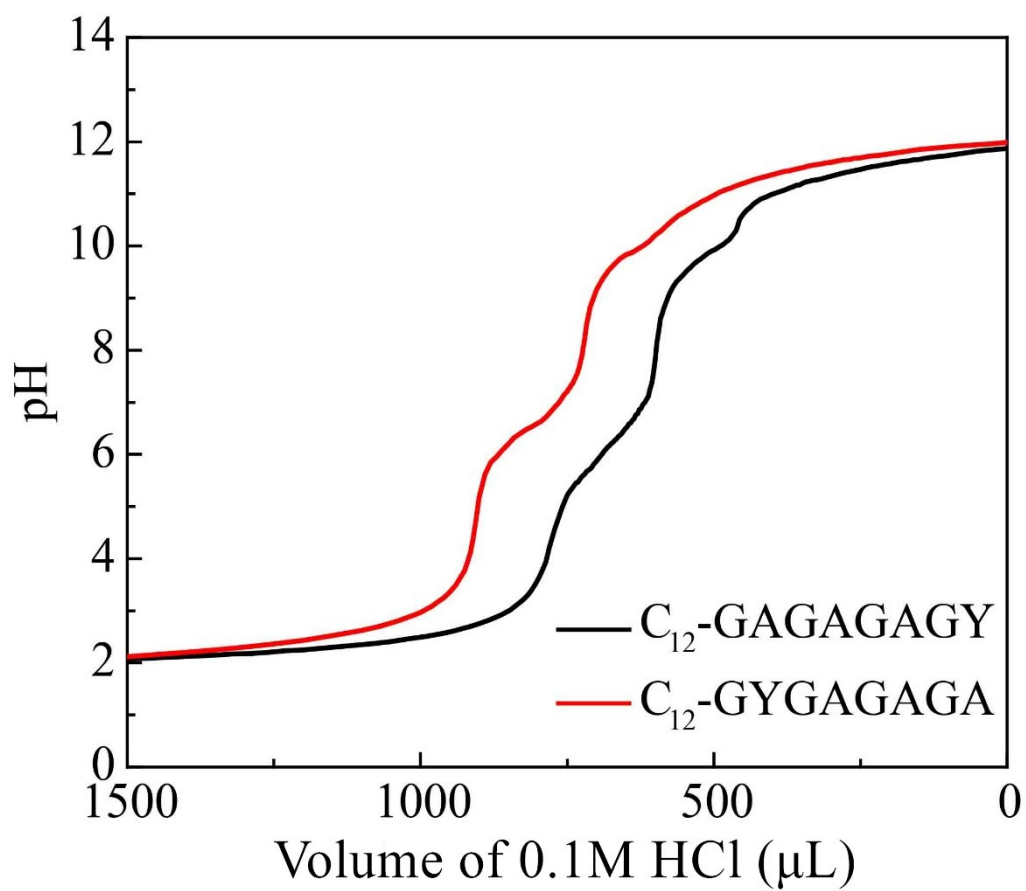

**Figure S6.** pH titration curves of C<sub>12</sub>-GAGAGAGY (black) and C<sub>12</sub>-GYGAGAGA (red), 1 mg/mL, aqueous solution.



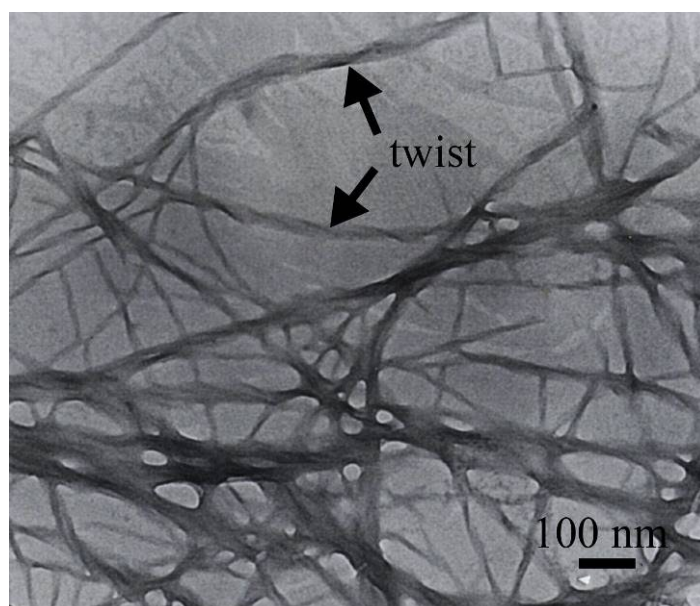

**Figure S7.** TEM image of twisted nanofibers assembled from  $C_{12}$ -GAGAGAGY at pH 8, pointed by the black arrows.

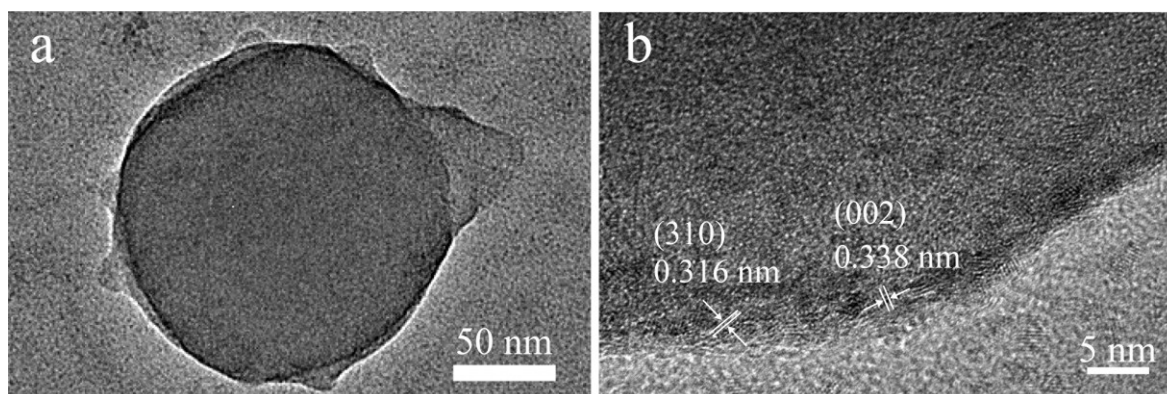

**Figure S8.** (a) TEM image of a nanosphere assembled from  $C_{12}$ -GYGAGAGA. The protuberance structures indicate the rugged surface of this nanosphere. (b) HRTEM image of the same nanosphere, which exhibits a hydrophilic surface confirmed by the lattice spacing ascribed to orthorhombic  $C_4H_6O_6U \cdot 2H_2O$ .

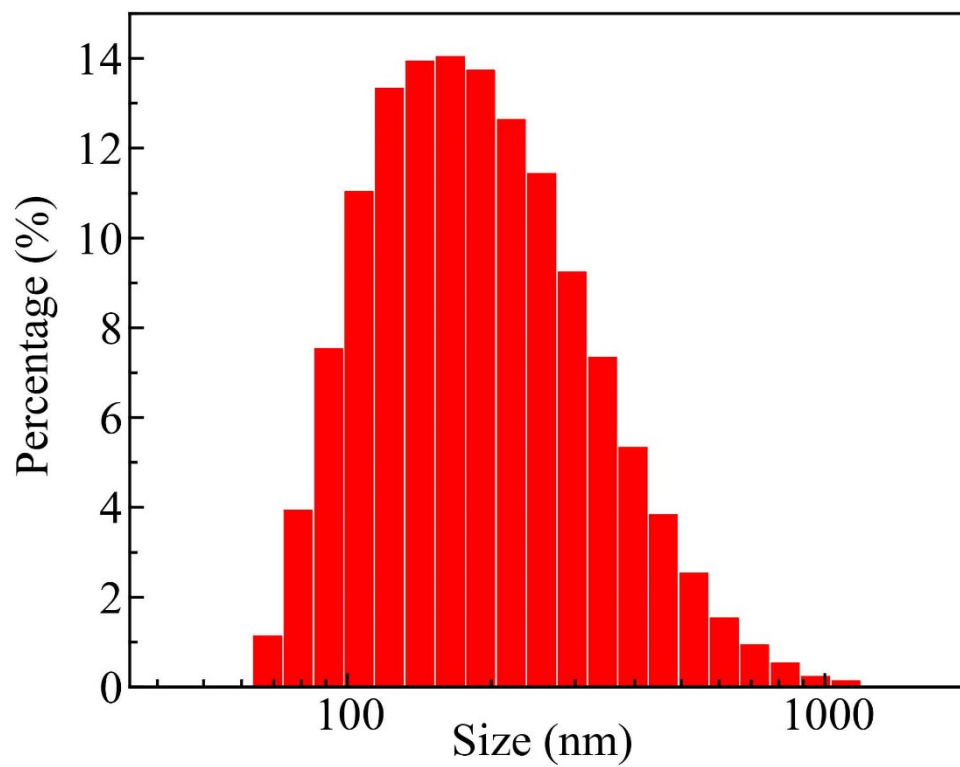

**Figure S9.** Size distribution of self-assembled C<sub>12</sub>-GYGAGAGA at pH 11 obtained via the Dynamic Light Scattering (DLS) measurement.

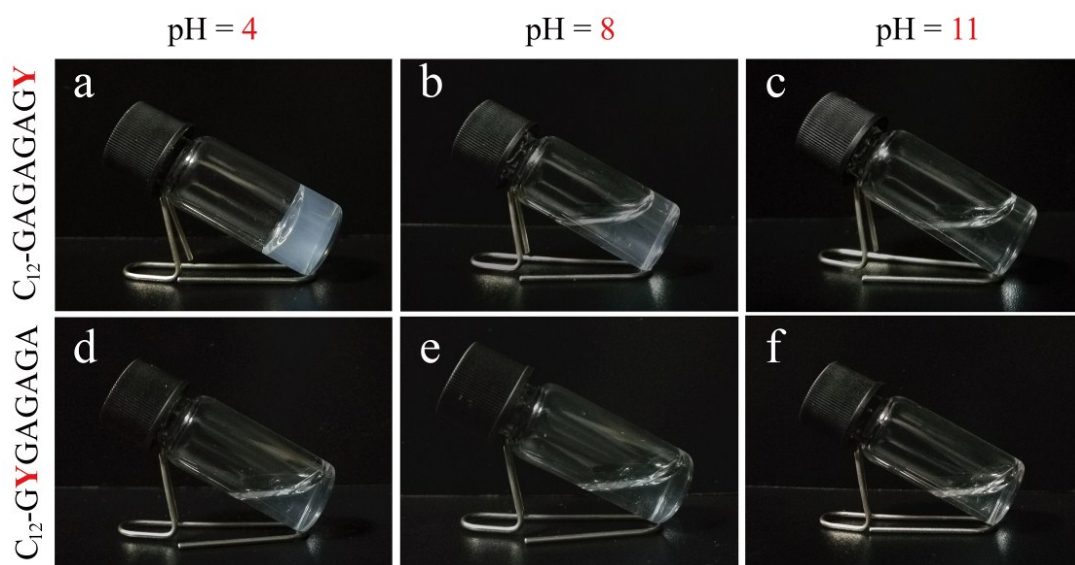

**Figure S10** Optical images of C<sub>12</sub>-GAGAGAGY/H<sub>2</sub>O (a-c, reworked from ref. 27 in the text) and C<sub>12</sub>-GYGAGAGA/H<sub>2</sub>O (d-f) systems at pH 4, 8 and 11.

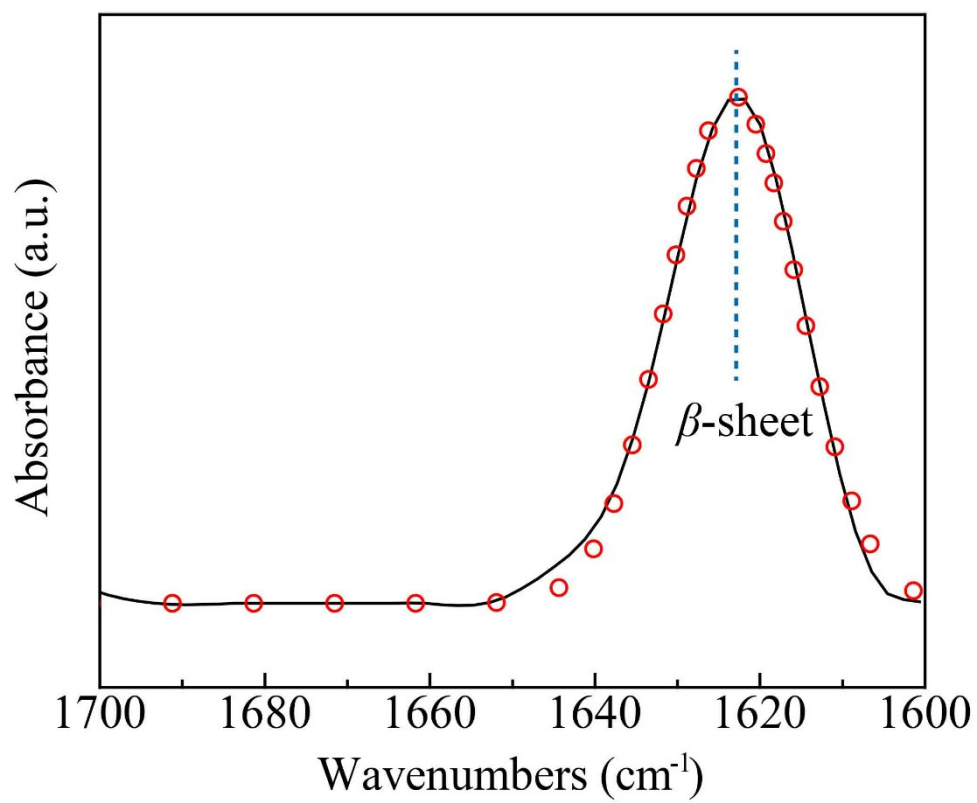

**Figure S11.** FT-IR spectrum and its fitted result of self-assembled C<sub>12</sub>-GAGYGAGA at pH 4.

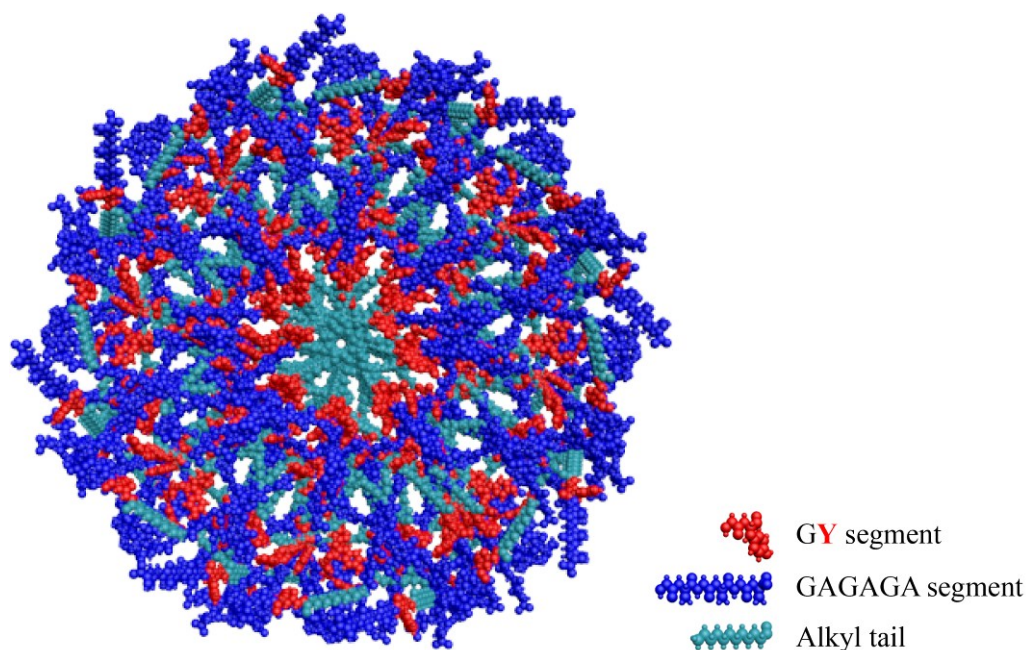

**Figure S12.** Schematic illustration of the cross section of the nanosphere consisted of C<sub>12</sub>-GYGAGAGA with a disordered conformation. Red, blue, cyan patterns indicate the GY, GAGAGA and alkyl chain, respectively.

**Table S1** Z-Average and particle dispersion index (PDI) results of self-assembled C<sub>12</sub>-GAGYGAGA (pH 11), C<sub>12</sub>-GYGAGAGA (pH 11) and C<sub>12</sub>-GYGAGAGA (pH 8) at different concentrations via the Dynamic Light Scattering (DLS) measurement.

| PAs (pH)                                          | 1 mg/mL        |      |                        | 0.1 mg/mL      |      |                        |
|---------------------------------------------------|----------------|------|------------------------|----------------|------|------------------------|
|                                                   | Z-Average (nm) | PDI  | Size Distribution (nm) | Z-Average (nm) | PDI  | Size Distribution (nm) |
| C <sub>12</sub> -GAGY(GA) <sub>2</sub><br>pH = 11 | 290            | 0.29 | 70-600                 | 300            | 0.29 | 70-600                 |
| C <sub>12</sub> -GY(GA) <sub>3</sub><br>pH = 11   | 260            | 0.30 | 80-600                 | 260            | 0.36 | 80-600                 |
| C <sub>12</sub> -GY(GA) <sub>3</sub><br>pH = 8    | 310            | 0.50 | 100-650                | 310            | 0.44 | 90-650                 |
